# Supplementary material for: bis-Nitrile and bis-Dialkylcyanamide Platinum(II) Complexes as Efficient Catalysts for Hydrosilylation Cross-Linking of Siloxane Polymers
Source: PubMed Central journal article supplement (PMC6274487; doi:10.3390/molecules21030311), 2016-03-05
Supplement: molecules-21-00311-s001.pdf [file molecules-21-00311-s001.pdf]

# Supplementary Materials: *bis*-Nitrile and *bis*-Dialkylcyanamide Platinum(II) Complexes as Efficient Catalysts for Hydrosilylation Cross-linking of Siloxane Polymers

Regina M. Islamova, Mikhail V. Dobrynin, Daniil M. Ivanov, Andreii V. Vlasov, Elena V. Kaganova, Galina V. Grigoryan and Vadim Yu. Kukushkin

IR Data of the Cross-linking

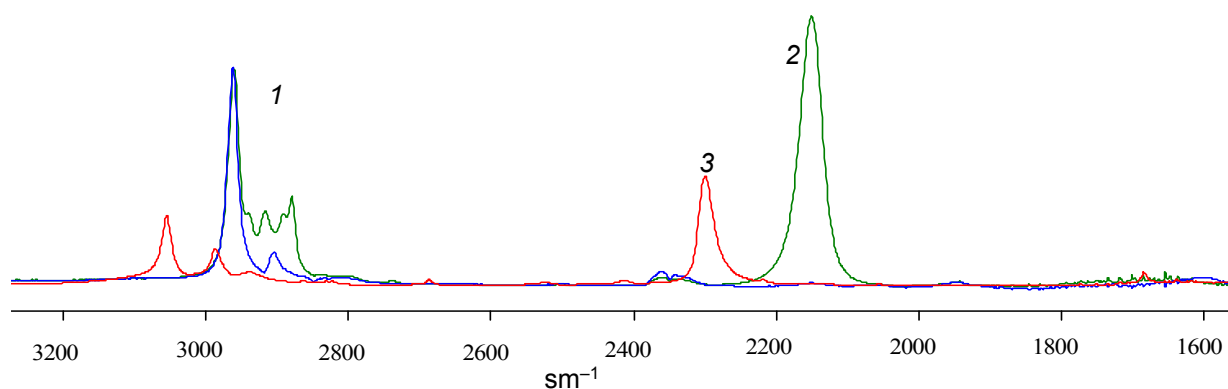

Figure S1. The IR spectra of PDMS (1), EHDMS (2), and *cis*-1 (3) ( $1.0 \times 10^{-3}$  mol/L).

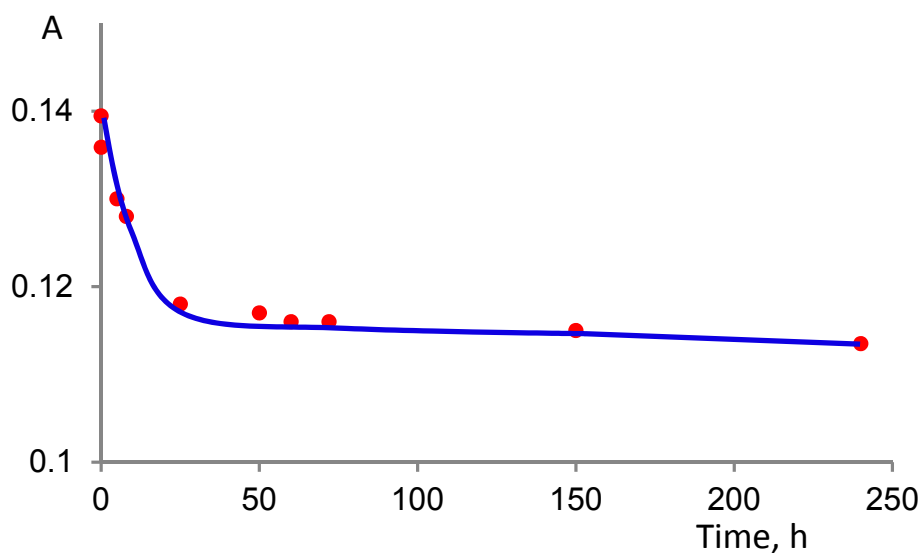

Figure S2. Intensity of absorption band at 2152 cm<sup>-1</sup> vs. time of the cross-linking with *cis*-1 ( $1.0 \times 10^{-3}$  mol/L).

**Structure-Activity Relationships of *trans*-(1–4)**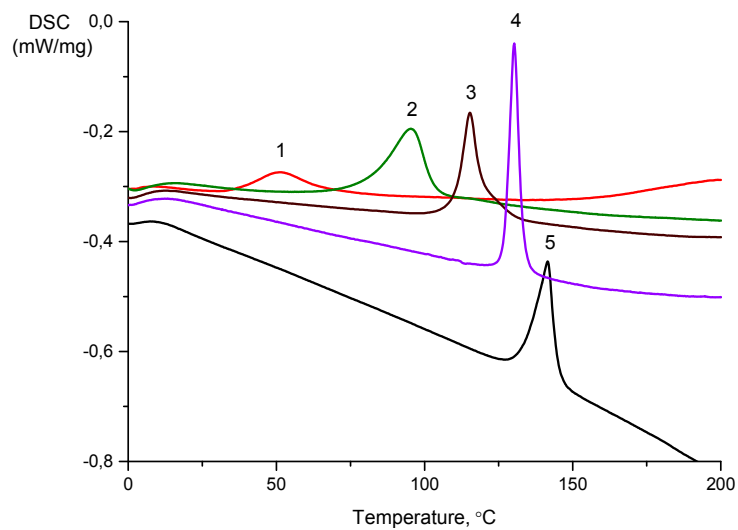

**Figure S3.** DSC curves of the curing catalyzed by: Karstedt's catalyst ( $1.0 \times 10^{-5}$  mol/L) (1); *trans*-4 ( $1.0 \times 10^{-3}$  mol/L) (2); *trans*-3 ( $1.0 \times 10^{-3}$  mol/L) (3); *trans*-2 ( $1.0 \times 10^{-3}$  mol/L) (4); *trans*-1 ( $1.0 \times 10^{-3}$  mol/L) (5).

**Stability of *cis*-4 in Polysiloxane Solution in Air**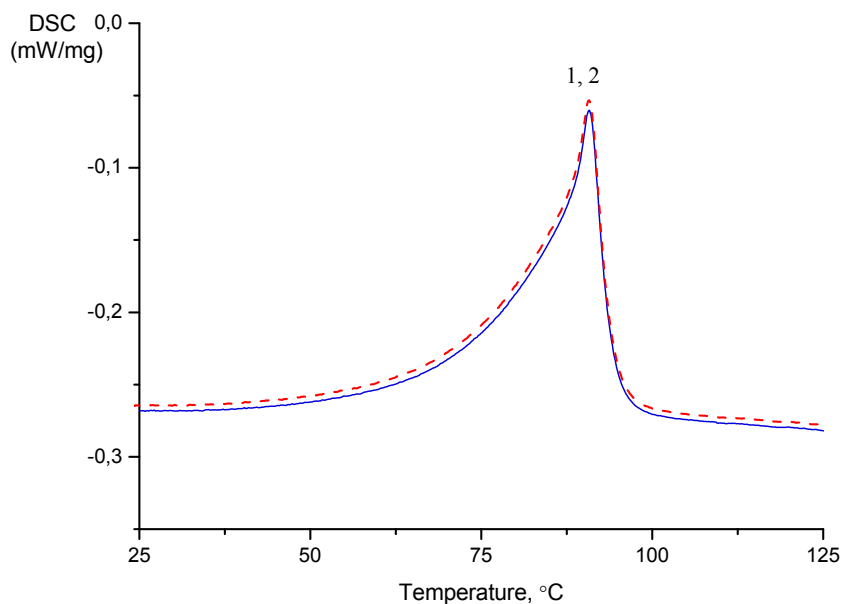

**Figure S4.** DSC curves of the PDMS and EHDMS cross-linking catalyzed by *cis*-4 ( $1.0 \times 10^{-4}$  mol/L) immediately after mixing (1) and by *cis*-4 ( $1.0 \times 10^{-4}$  mol/L) after 30 days (2).

## DSC Data for Silicone Rubbers

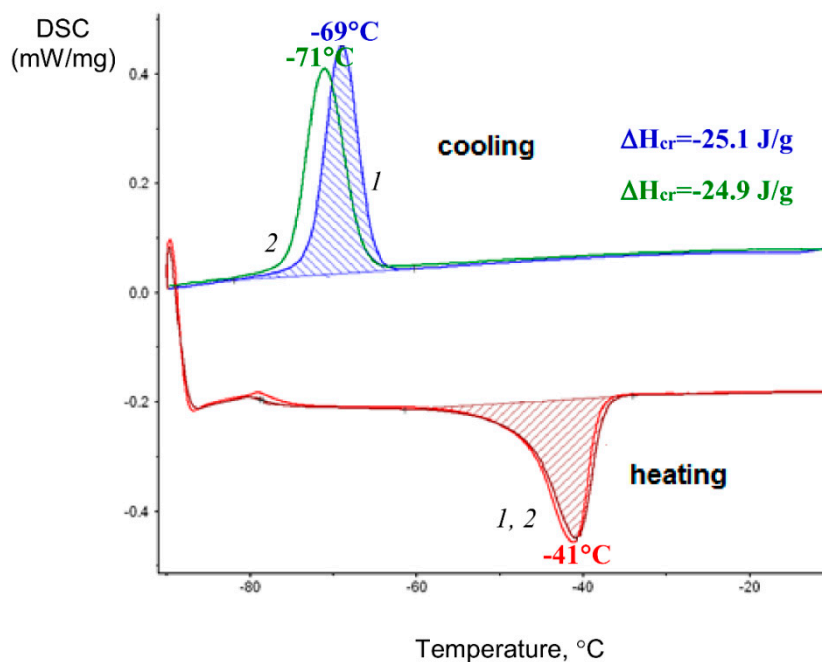

**Figure S5.** Effect of the nature of platinum catalyst on the crystallization and melting of PDMS-EHDMS silicon rubber: 1-Karstedt's catalyst, 2-1 ( $1.0 \times 10^{-3}$  mol/L).

## TG Measurements

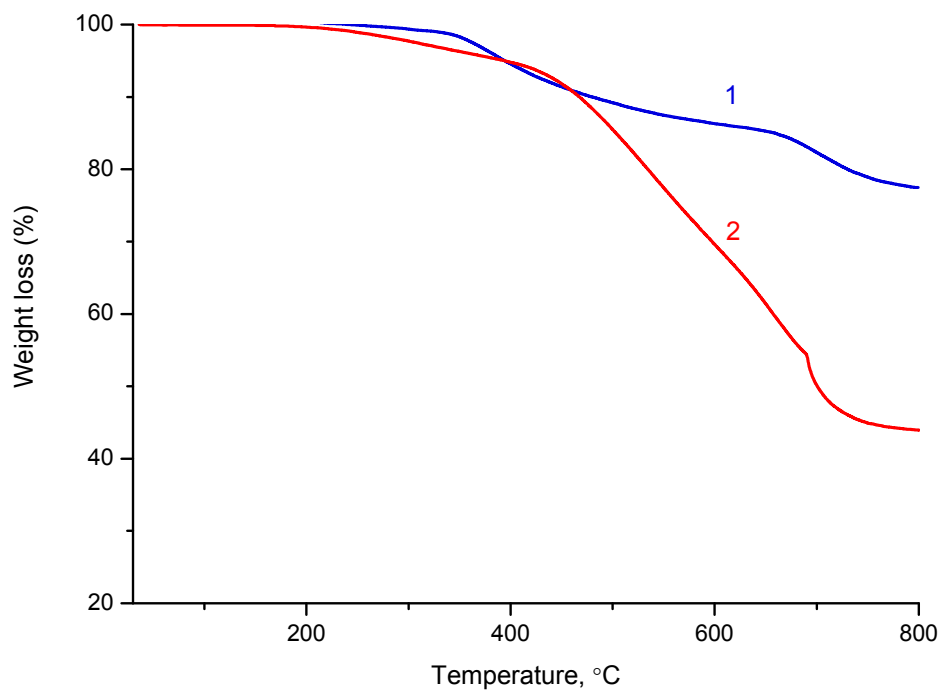

**Figure S6.** Effect of the nature of platinum catalyst on the thermal degradation of the PDMS-EHDMS silicon rubber in argon. 1-*cis*-4 ( $1.0 \times 10^{-5}$  mol/L); 2-Karstedt's catalyst ( $1.0 \times 10^{-5}$  mol/L).

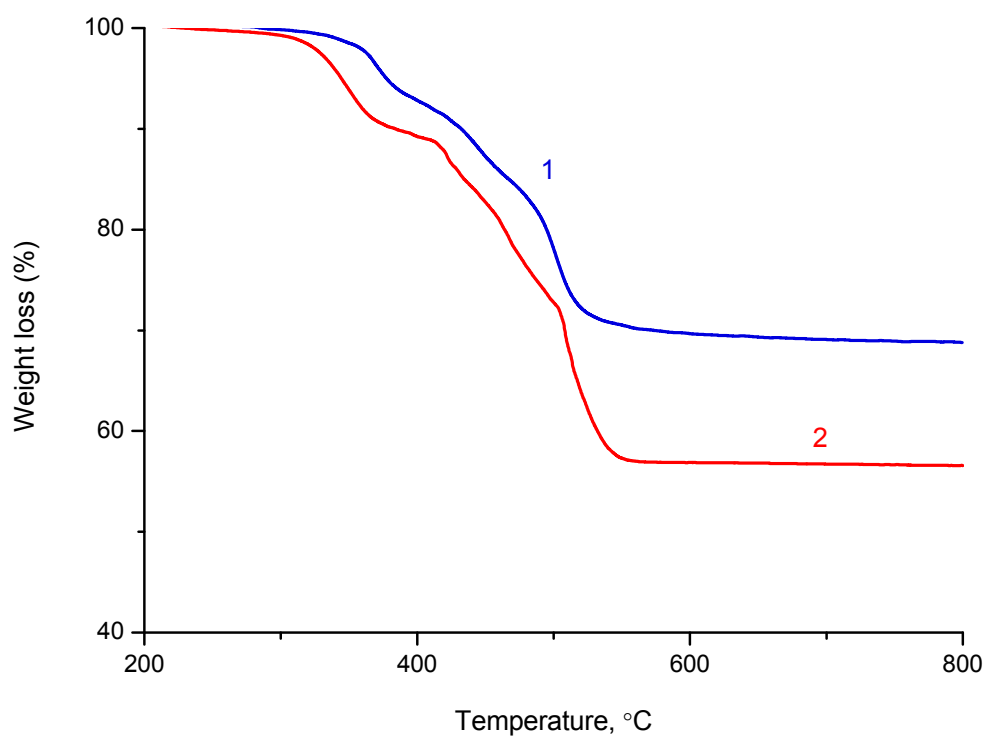

**Figure S7.** Effect of the nature of platinum catalyst on the thermal degradation of the PDMS-EHDMS silicon rubber in air. 1-*cis*-1 ( $1.0 \times 10^{-5}$  mol/L); 2-Karstedt's catalyst ( $1.0 \times 10^{-5}$  mol/L).
